# Supplementary material for: Cohort profile: the Swiss Mother and Child HIV Cohort Study (MoCHiV)
Source: PubMed Central journal article supplement (PMC11418562; doi:10.1136/bmjopen-2024-086543), 2024-09-23
Supplement: bmjopen-14-9-s001.pdf [file bmjopen-14-9-s001.pdf]

**Supplementary Table 1** Baseline characteristics of women giving birth in SHCS and MoCHiV between 01/1986 and 12/2022

|                                         | Total        | Registered in MoCHiV | Not registered in MoCHiV | <i>p-value</i> <sup>a</sup> |
|-----------------------------------------|--------------|----------------------|--------------------------|-----------------------------|
| <b>Mothers</b>                          |              |                      |                          |                             |
|                                         | 1209         | 1041                 | 168                      |                             |
| <b>Total mothers registered in SHCS</b> |              |                      |                          | <b>&lt; 0.001</b>           |
| Active patients                         | 777 (64 %)   | 647 (62 %)           | 130 (77 %)               |                             |
| Voluntary                               | 115 (10 %)   | 109 (10 %)           | 6 (4 %)                  |                             |
| Died                                    | 59 (5 %)     | 55 (5 %)             | 4 (2 %)                  |                             |
| Lost to follow-up                       | 258 (21 %)   | 230 (22 %)           | 28 (17 %)                |                             |
| <b>Age in years at HIV diagnosis</b>    |              |                      |                          | <b>0.015</b>                |
| Median (IQR)                            | 27 [23, 31]  | 26 [23, 31]          | 28 [23, 32]              |                             |
| <b>Ethnicity</b>                        |              |                      |                          | <b>0.047</b>                |
| Black                                   | 540 (45 %)   | 455 (44 %)           | 85 (51 %)                |                             |
| White                                   | 513 (42 %)   | 445 (43 %)           | 68 (40 %)                |                             |
| Asian                                   | 72 (6 %)     | 65 (6 %)             | 7 (4 %)                  |                             |
| Hispano-American                        | 45 (4 %)     | 37 (4 %)             | 8 (5 %)                  |                             |
| Unknown                                 | 39 (3 %)     | 39 (4 %)             | 0 (0 %)                  |                             |
| <b>Source of HIV infection</b>          |              |                      |                          | <b>0.003</b>                |
| Heterosexual Contact                    | 951 (79 %)   | 818 (79 %)           | 133 (79 %)               |                             |
| Intravenous drug use                    | 164 (14 %)   | 152 (15 %)           | 12 (7 %)                 |                             |
| Perinatal transmission                  | 22 (2 %)     | 18 (2 %)             | 4 (2 %)                  |                             |
| Blood Products                          | 19 (2 %)     | 14 (1 %)             | 5 (3 %)                  |                             |
| Unknown                                 | 53 (4 %)     | 39 (4 %)             | 14 (8 %)                 |                             |
| <b>Viral load at delivery</b>           |              |                      |                          | <b>&lt; 0.001</b>           |
| < 50 copies/ml                          | 663 (55 %)   | 577 (55 %)           | 86 (51 %)                |                             |
| 50- 1000 copies/ml                      | 116 (10 %)   | 106 (10 %)           | 10 (6 %)                 |                             |
| > 1000 copies/ml                        | 119 (10 %)   | 114 (11 %)           | 5 (3 %)                  |                             |
| Log10 of median if >                    | 4 [3.5, 4.4] | 4 [3.5, 4.4]         | 4.1 [3.5, 4.3]           |                             |
| Unknown                                 | 311 (26 %)   | 244 (23 %)           | 67 (40 %)                |                             |

<sup>a</sup> Chi-Square test for categorical variables and Welch's t-test for continuous variable were used

**Abbreviations:** IQR, interquartile range; MoCHiV, Swiss Mother and Child HIV Cohort Study; SHCS, Swiss HIV Cohort Study
