# Supplementary material for: Cohort profile: the Swiss Mother and Child HIV Cohort Study (MoCHiV)
Source: PubMed Central journal article supplement (PMC11418562; doi:10.1136/bmjopen-2024-086543), 2024-09-23

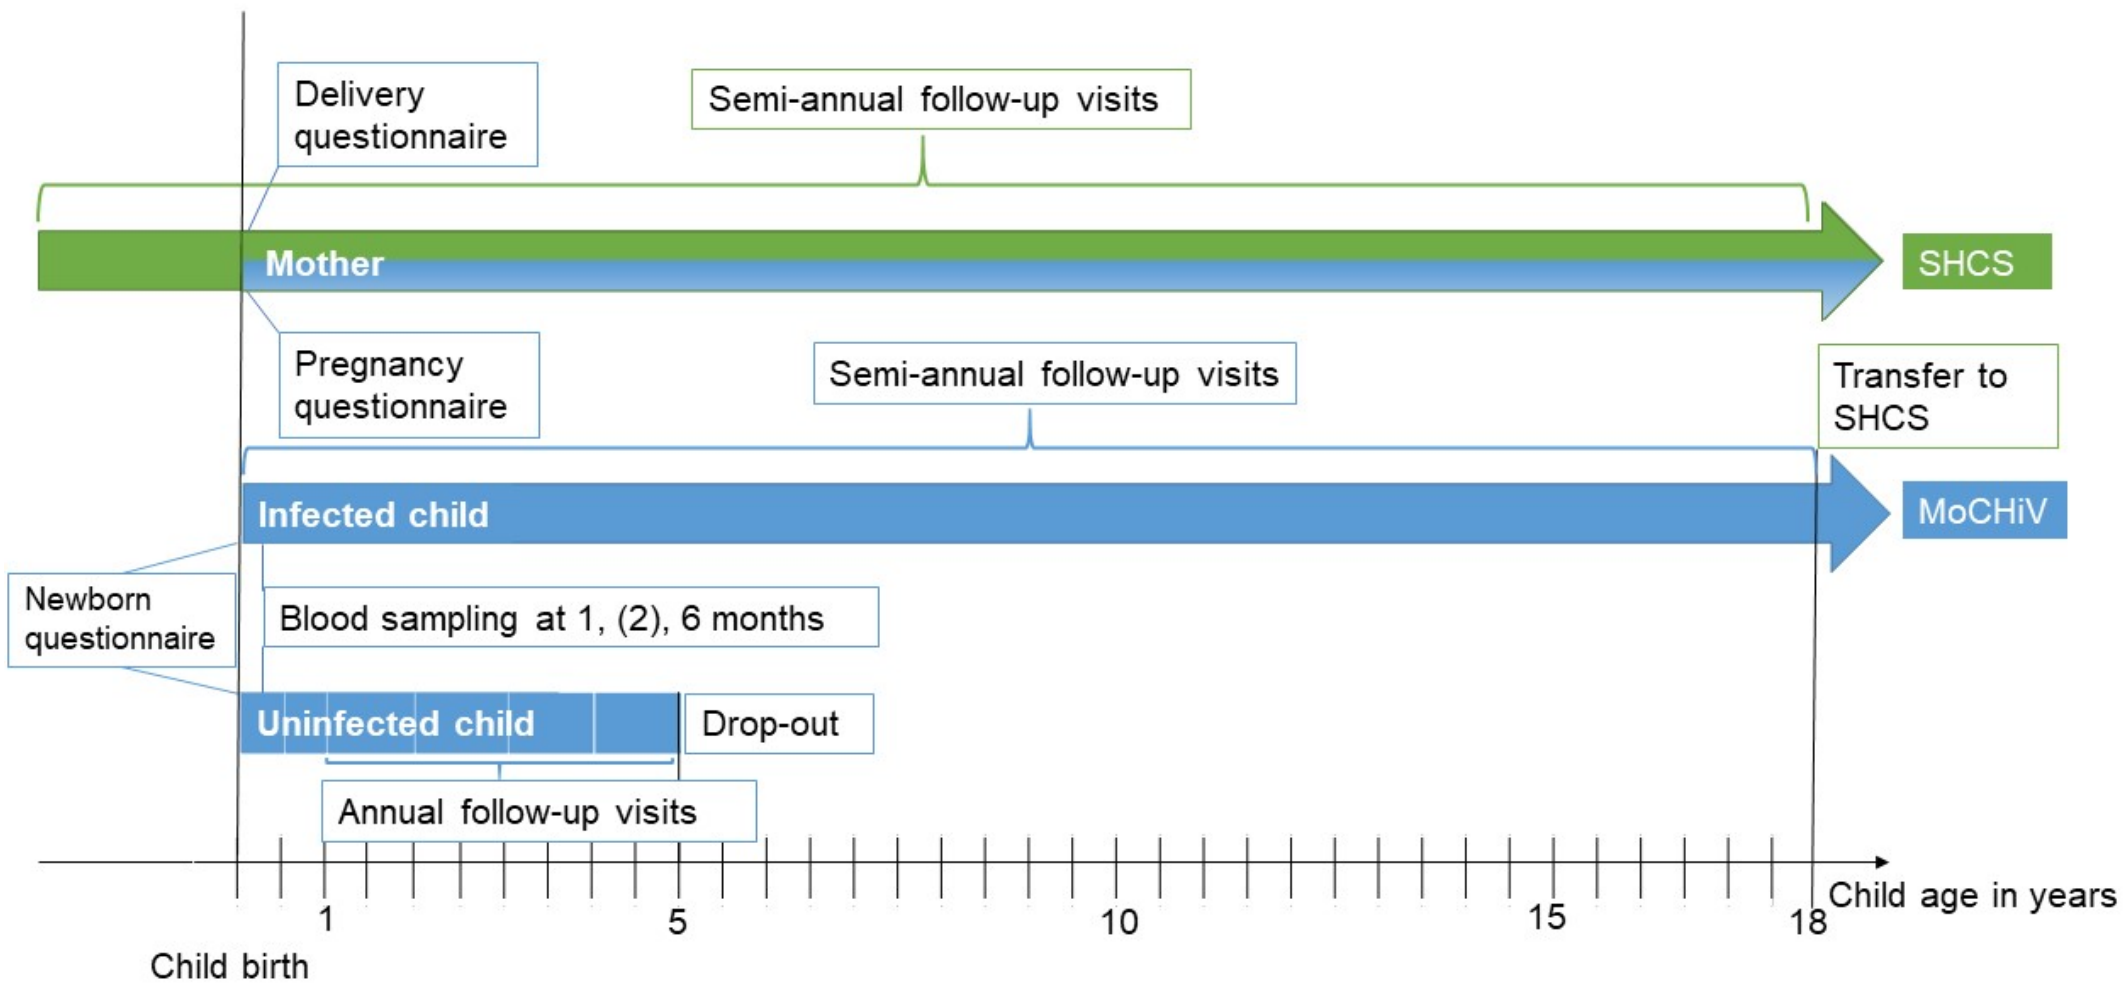

Supplement: bmjopen-14-9-s002.pdf [file bmjopen-14-9-s002.pdf]
